# Supplementary material for: The Optimal Number of Surveys when Detectability Varies
Source: PubMed Central journal article supplement (PMC4272285; doi:10.1371/journal.pone.0115345), 2014-12-19

**Figure S1. Effect of scaled budget on the optimal number of surveys for objective 1.**

For a constant budget to fixed-cost ratio of 10: (a) Scaled budget  $B'$  versus the optimal number of surveys  $n$ , (b) the corresponding optimal expected probability of detection failure. Black and blue lines correspond to a coefficient of variation equal to 0.5 and 3 respectively. The solid-line corresponds to the exact solution and dashed-line to the approximate solution (Note, in figure (b) the black dashed-line is obscured by the solid black-line).

(a)

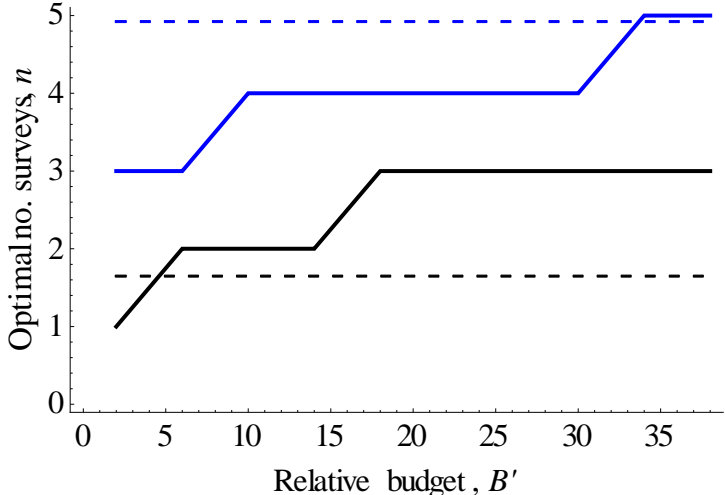

(b)

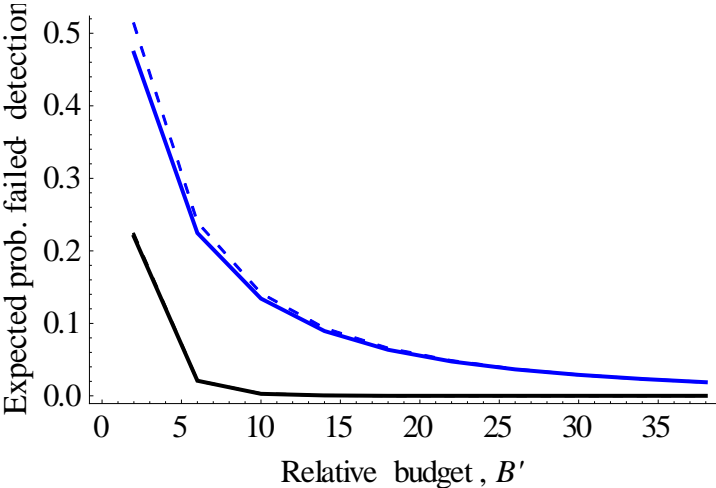

Supplement: pone.0115345.s001.pdf [file pone.0115345.s001.pdf]
