# Supplementary material for: The Optimal Number of Surveys when Detectability Varies
Source: PubMed Central journal article supplement (PMC4272285; doi:10.1371/journal.pone.0115345), 2014-12-19

**Figure S2. Difference between exact and approximate solution for objective 1.** Difference in optimal number of surveys for the approximate and exact solution (approximate minus exact solution),  $c'=0.5$ .

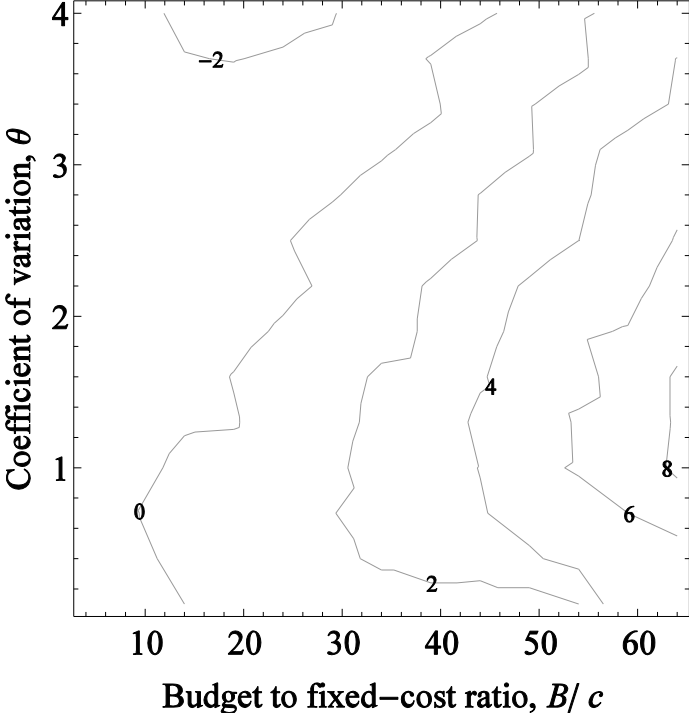

Supplement: pone.0115345.s002.pdf [file pone.0115345.s002.pdf]
