# Supplementary material for: The Optimal Number of Surveys when Detectability Varies
Source: PubMed Central journal article supplement (PMC4272285; doi:10.1371/journal.pone.0115345), 2014-12-19

**Figure S3. Value of objective function for objective 1.** (a) expected probability of failed-detection  $E[Q]$  for exact solution, (b) difference in expected probability of failed-detection  $E[Q]$  for exact and approximate solutions.  $c' = 0.5$ .

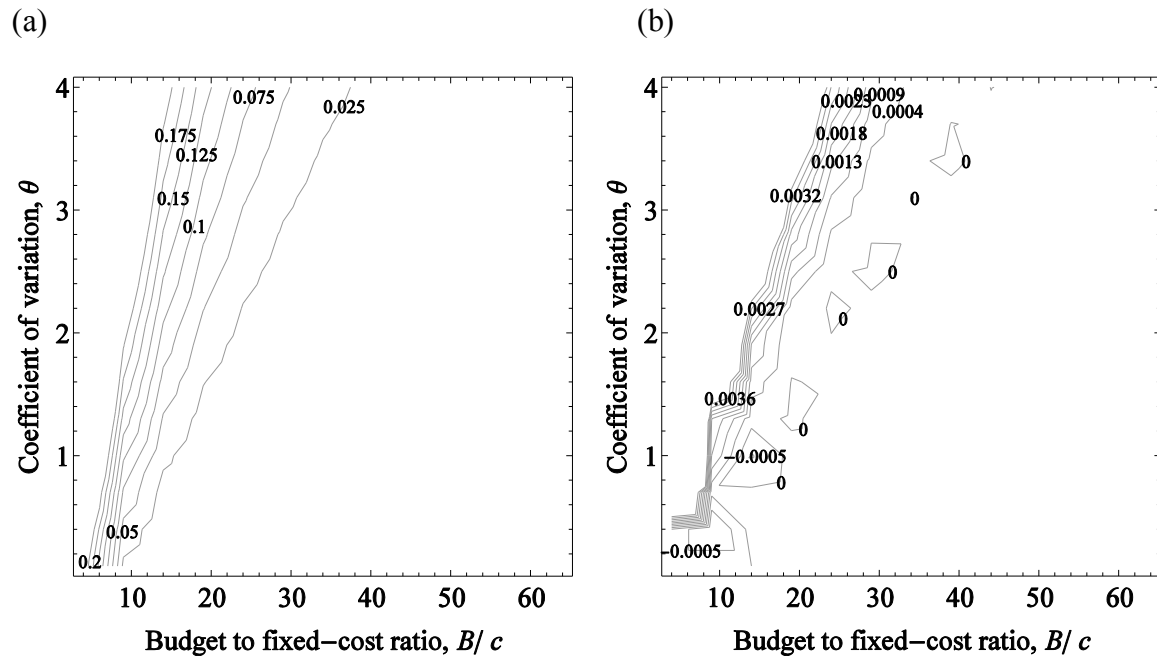

Supplement: pone.0115345.s003.pdf [file pone.0115345.s003.pdf]
