# Supplementary material for: The Optimal Number of Surveys when Detectability Varies
Source: PubMed Central journal article supplement (PMC4272285; doi:10.1371/journal.pone.0115345), 2014-12-19

**Figure S5. Difference between exact and approximate solution for objective 2.** Difference between exact and approximate solution as a function of the scaled budget and (a) coefficient of variation ( $Q_c = 0.05$ ), and (b) detection target ( $\theta = 1.5$ ).  $c' = 0.5$ .

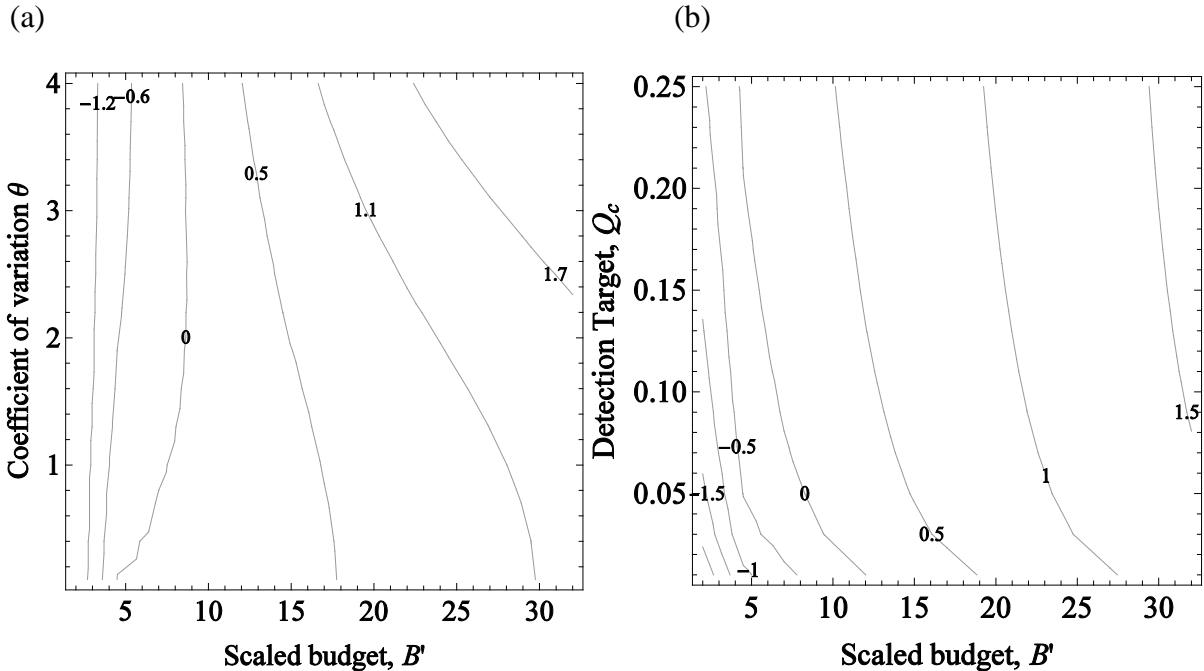

Supplement: pone.0115345.s005.pdf [file pone.0115345.s005.pdf]
