# Supplementary material for: The Optimal Number of Surveys when Detectability Varies
Source: PubMed Central journal article supplement (PMC4272285; doi:10.1371/journal.pone.0115345), 2014-12-19

**Figure S6. Correlation coefficient  $r$  and the optimal number of surveys for *Litoria pearsoniana*.** Effect of correlation coefficient  $r$  on the optimal number of surveys for *Litoria pearsonia* when the objective is to (a)&(b) maximise the expected probability of detection and (c)&(d) maximise the probability of satisfying a prescribed detection target of 95%. (a)&(c): abundance = 1 ( $\mu=0.67$ ); (b)&(d) abundance = 3 ( $\mu=2.2$ ). Fixed cost  $c = 1$  hour and survey season length  $T = 90$  days.

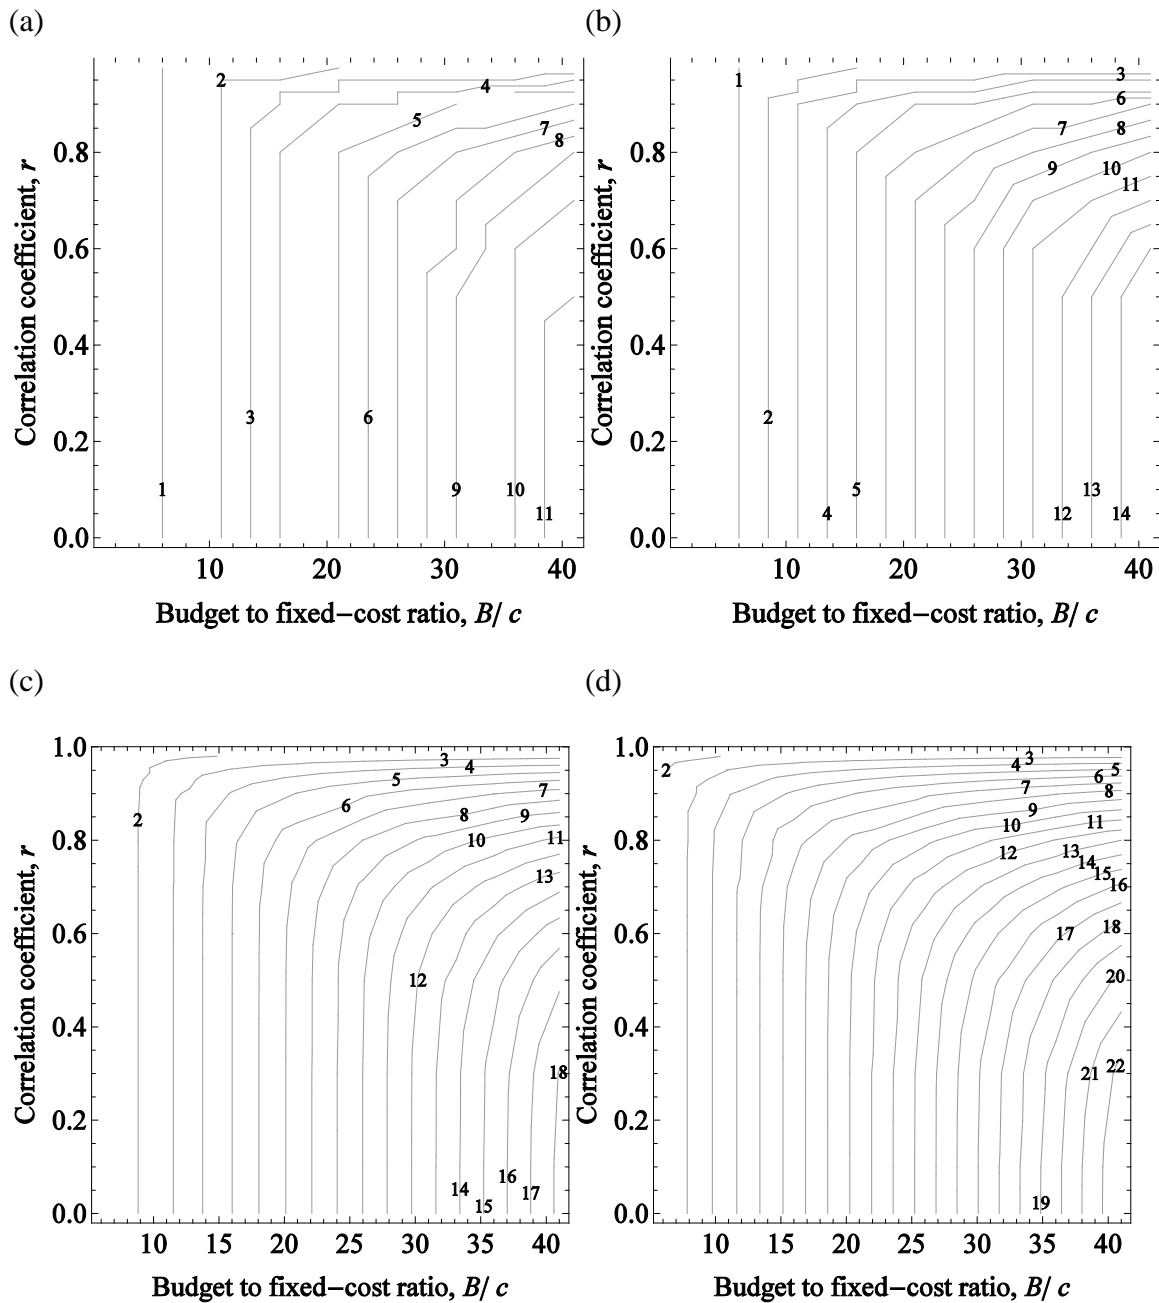

Supplement: pone.0115345.s006.pdf [file pone.0115345.s006.pdf]
