# Supplementary material for: The Optimal Number of Surveys when Detectability Varies
Source: PubMed Central journal article supplement (PMC4272285; doi:10.1371/journal.pone.0115345), 2014-12-19

**Figure S7. Difference between the optimal solution and a single visit.** Difference in the value of the objective function between the optimal solution (solid-line) and a single visit (dashed-line) when the objective is to (a) maximise the expected probability of detection and (b) maximise the probability of satisfying a prescribed detection target of 95%, for 3 different values of the coefficient of variation (purple:  $\theta=0.5$ , orange:  $\theta=1$ , blue:  $\theta=3$ ).  $B/c = 15$  for both graphs.

(a)

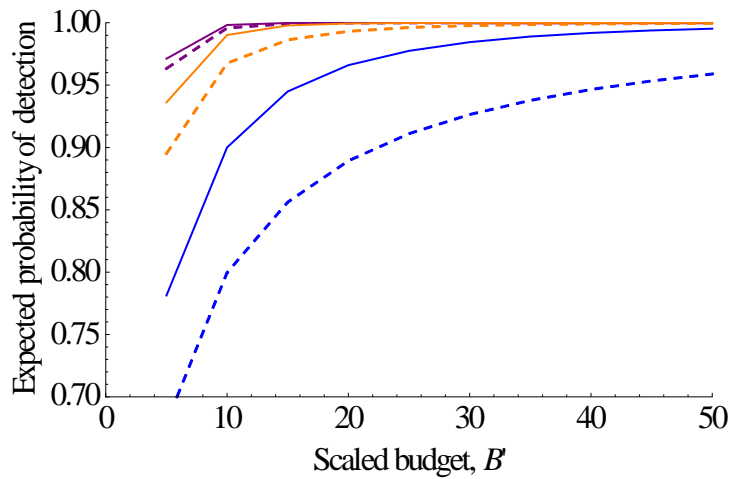

(b)

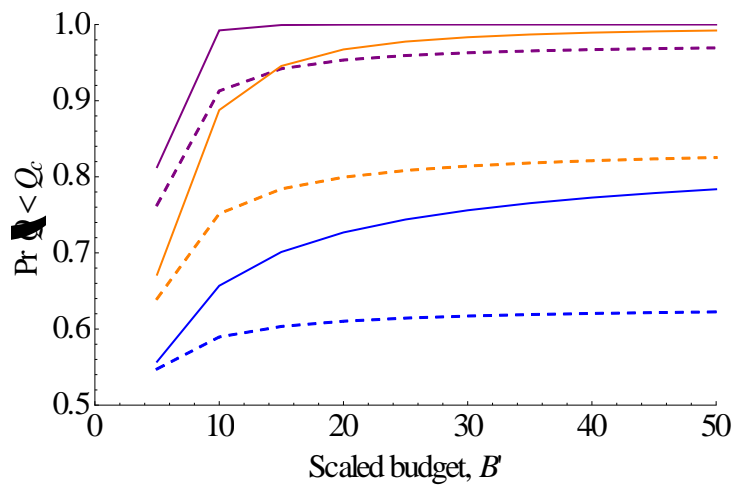

Supplement: pone.0115345.s007.pdf [file pone.0115345.s007.pdf]
